# Supplementary material
Source: PubMed Central journal article supplement (PMC10034663)
Supplement: jamadermatol-e230205-s001.pdf [file jamadermatol-e230205-s001.pdf]

1 **PROTOCOL TITLE:**

2 *Topical treatment for superficial disseminated actinic porokeratosis: A Single-blinded*  
3 *Comparison Between Lovastatin/Cholesterol and Lovastatin*

4

5 **PRINCIPAL INVESTIGATOR:** Dr. Dirk Elston

6

7

8

9

10  
11  
12  
13  
14  
15  
16  
17  
18  
19  
20  
21  
22  
23  
24  
25  
26  
27  
28  
29  
30  
31  
32  
33  
34  
35  
36  
37  
38  
39  
40  
41  
42  
43  
44  
45  
46  
47  
48  
49

## 1.0 Objectives / Specific Aims

- The purpose of this study is to evaluate the effectiveness of cholesterol/lovastatin versus lovastatin alone to treat porokeratosis. Our working hypothesis is that both topical cholesterol/lovastatin and lovastatin alone are helpful in treating patients with disseminated superficial actinic porokeratosis (DSAP).
- Aims:
  - 1. To evaluate the response to treatment with topical cholesterol/lovastatin and lovastatin alone in a series of patients with the diagnosis of DSAP.
  - 2. To characterize lesion patterns following topical treatment and patterns of lesion regression.

## 2.0 Background

Porokeratosis is a premalignant condition with a malignant transformation rate of 7.5%<sup>1</sup>. Variants include disseminated superficial actinic porokeratosis (DSAP), disseminated superficial porokeratosis, porokeratosis of Mibelli, porokeratosis palmaris et plantaris disseminate, porokeratosis ptychotropa, and linear porokeratosis.

Porokeratosis is a rare condition involving clonal proliferation of abnormal keratinocytes that can be inherited or acquired. DSAP is the most common type of porokeratosis. It is described as a well circumscribed, erythematous macule with a peripheral rim of hyperkeratosis, also referred to as the coronoid lamella. While typically benign, lesions may develop into squamous cell carcinoma or Bowen's disease<sup>1</sup>. The lesions typically spare the palms and soles and are most prevalent on the extensor surfaces and back. DSAP typically presents in patients in their 30s and 40s who have a history of extensive ultraviolet radiation exposure. It is estimated to occur in a female to male ratio of 1.8:1<sup>2</sup>.

The exact pathogenesis for DSAP is currently unknown, however, the mevalonate genetic pathways are suspected to play a role in development. In one study, at least one mutation in the mevalonate pathway was found in 98% of familial cases and 70% of sporadic cases<sup>3</sup>. Treatment usually consists of destruction of the lesion utilizing cryotherapy, photodynamic therapy, carbon dioxide lasers, 5-fluorouracil. However, recent observations have suggested that various porokeratosis variants arise in areas affected by second-hit mutations in genes encoding components of the mevalonate pathway. Consequently, investigators from Yale University successfully treated a series of patients with topical cholesterol/lovastatin which resulted in complete clearance of DSAP lesions after 4 weeks of treatment<sup>4</sup>.

It is hypothesized that statins will block the accumulation of toxic metabolites in the mevalonate pathway, while topical cholesterol will provide the essential nourishment to the cells<sup>4</sup>. This study will provide a larger sample size and allow us to observe more definitive outcomes of the stain/cholesterol therapy.

## 3.0 Intervention to be studied

Noninvasive in vivo imaging techniques have become an important diagnostic aid for skin cancer detection. Dermoscopy, also known as dermatoscopy, epiluminescence microscopy, incident light microscopy, or skin surface microscopy, is performed using a handheld instrument called a

54 dermatoscope or dermoscope, which has a transilluminating light source and standard magnifying  
55 optics (10×). The dermatoscope facilitates visualization of subsurface skin structures located  
56 within the epidermis, dermoepidermal junction, and papillary dermis, which are otherwise  
57 invisible to the unaided eye. Colors and structures visible with dermoscopy are required for  
58 generating a correct diagnosis.  
59

60 Dermlite dermatoscopes are approved by the FDA.

61  
62 We will utilize 2% cholesterol and 2% lovastatin ointment. It will be compounded by a  
63 pharmacist. Ointment will be applied on lesional skin with occlusion twice daily.  
64 Cholesterol and lovastatin are not approved by the FDA to be used in porokeratosis but are  
65 used off-label by physicians for the treatment of DSAP.

### 66 67 Pharmacology

68 Cholesterol is an animal sterol found in the body tissues (and blood plasma) of vertebrates.  
69 It can be found in large concentrations within the liver, spinal cord, and brain. Cholesterol  
70 is an important component of the membranes of cells, providing stability. Cholesterol is  
71 distributed universally in all animal tissues. It can be derived either from intestinal  
72 absorption of dietary cholesterol or from synthesis de novo within the body. Cholesterol  
73 itself in the animal system is the precursor of bile acids, steroid hormones, and provitamin  
74 D3.

75  
76 Lovastatin is a lactone metabolite isolated from the fungus *Aspergillus terreus* with  
77 cholesterol-lowering and potential antineoplastic activities. Lovastatin is hydrolyzed to the  
78 active beta-hydroxyacid form, which competitively inhibits 3-hydroxyl-3-  
79 methylglutarylcoenzyme A (HMG-CoA) reductase, an enzyme involved in cholesterol  
80 biosynthesis. In addition, this agent may induce tumor cell apoptosis and inhibit tumor cell  
81 invasiveness, possibly by inhibiting protein farnesylation and protein geranylgeranylation,  
82 and may arrest cells in the G1 phase of the cell cycle. Studies suggest that less than 5% of  
83 the oral dose reaches the general circulation as active inhibitors and the time to peak serum  
84 concentration is 2-4 hours. Lovastatin undergoes extensive first-pass metabolism so the  
85 availability of the drug in the system is low and variable. The peak concentrations of  
86 lovastatin when a dose of 10-40 mg is administered are reported to range from 1.04-4.03  
87 ng/ml and an AUC of 14-53 ng.h/ml. This indicates that lovastatin presents a dose-  
88 dependent pharmacokinetic profile.

89 Lovastatin is a HMG-CoA reductase inhibitors that has been used topically for the  
90 treatment of skin disorders such as acne, seborrhoea, rosacea, rhinophyma, atopic  
91 dermatitis, contact dermatitis and ichthyosis (US Patent 5,730,992 1998 and US Patent  
92 6,126,947 2000). Topical lovastatin at 49 mM (20 mg/ml) in 95% ethanol is well-tolerated  
93 with limited side effects. Muscle breakdown may occur resulting in signs and symptoms  
94 such as myalgias, fasciculations, cramping, myopathy, rhabdomyolysis and increased  
95 levels creatine kinases in the blood. The ethanol component may induce mild skin dryness.  
96 It was effective in the treatment of acne vulgaris, thus supporting the expectation of  
97 absorption through the skin. Lovastatin is known to cause reversible cell cycle arrest and  
98 effective concentrations depend on cell type and experimental conditions, but cell culture

99 concentrations of 2 to 20  $\mu\text{M}$  (0.8–8.0  $\mu\text{g/ml}$ ) for up to 72 h result in reversible cell cycle  
100 arrest with cells beginning to cycle after 6 hrs<sup>5,6</sup>.

#### 102 **4.0 Study Endpoints**

- 103 • Percentage of clearance of disseminated superficial actinic porokeratosis lesions after  
104 12 weeks of therapy
- 105 • Validated scale changes: Patient Quality of Life (RAND36, DLQI), Physician Global  
106 Assessment Scale (DSAP-PGA), Actinic Keratosis Field Assessment Scale
- 107 • Clearance of coronoid lamella on dermoscopy (or photograph) after 12 weeks of  
108 therapy.

#### 109 **5.0 Inclusion and Exclusion Criteria/ Study Population**

##### 110 **Inclusion Criteria**

- 111 • All patients 18 years and older with the diagnosis of disseminated superficial  
112 actinic porokeratosis.

##### 113 **Exclusion Criteria**

- 114 • Patients with allergies or contraindications to lovastatin or cholesterol
- 115 • Female patients currently pregnant or lactating.
- 116 • Patients requiring their medications to be delivered to Alabama (Chemistry Rx  
117 does not dispense medications to this state)
- 118 • Female patients with plans to become pregnant.
  - 119 ○ Patients actively taking approved forms of long-term  
120 contraception (oral contraceptives, implantable intrauterine  
121 devices, or other hormone eluting implants) will be allowed  
122 to participate as long as they have no plan to become  
123 pregnant during the course of the study. A urine pregnancy  
124 test will be administered to these patients to confirm that  
125 they can be included in the study.

#### 126 **6.0 Number of Subjects**

127 Approximately 50 subjects will be recruited.

#### 128 **7.0 Setting**

- 129 • **Study Sites**
- 130 • Virtual video chat forums with patients living in the USA.
- 131 • Medical University of South Carolina
  - 132 ▪ Dermatology Clinics

#### 133 **8.0 Recruitment Methods**

137 Recruitment will occur after standard of care visits to the Dermatology Clinics, virtual  
138 visits, and chart review of eligible patients.

139 For standard of care visits, the first person to tell eligible patients about this study will be  
140 someone directly involved in their patient care. If they are interested, the aforementioned  
141 clinician and study team members will approach the patients without coercion and with the  
142 emphasis on the voluntary aspect of being on this study. Subjects will also be told in a  
143 caring manner that no matter what their decision is, it will not affect how their doctor cares  
144 for them as a patient or their care in general.

145 Patients discovered via chart review will be contacted to be informed of the potential  
146 research opportunity under the same aforementioned conditions. Only patients who have  
147 indicated they are willing to be contacted for research opportunities on their MUSC profile  
148 will be eligible for this form of contact. In this instance the first person to contact them  
149 may not be someone directly involved in their patient care.

150 Potential subjects who contact the study team members directly will also be considered for  
151 participation in the study. In this event, these potential subjects must have heard about the  
152 study through indirect information sources (clinicaltrials.gov, DSAP support groups, or  
153 other means by which the study team members did not directly advertise the study for  
154 purposes of recruitment). If they are interested, the aforementioned study team members  
155 will respond to them via email, and subsequently approach the patients virtually without  
156 coercion and with the emphasis on the voluntary aspect of being on this study. Subjects  
157 will also be told in a caring manner that no matter what their decision is, it will not affect  
158 how their doctor cares for them as a patient or their care in general.

## 161 9.0 Consent Process

162 Written informed consent will be obtained from subjects. Informed consent will be  
163 obtained in a private room within the clinics or privately via virtual visits. All subjects will  
164 undergo a prescreening call by study team members during which they are informed of the  
165 details of the study, eligibility concerns, and given the opportunity to ask and questions or  
166 address concern about the study. They will be sent the consent form immediately  
167 afterward, allowing them ample time to review the document before meeting the study  
168 team in person or virtually during visit 1 (week 0). During visit 1, the trained study team  
169 member performing consent will then review the consent form with them once again and  
170 address any questions before the sign the document and return it to the team via email.  
171 Virtual consenting will be performed on REDcap. Only trained research team members  
172 will be obtaining informed consent. Training will be performed by Alan Snyder and only  
173 those who are trained will perform informed consent after they sign the study training log.  
174 No waiting period will be necessary between informing the subjects and obtaining the  
175 consent; however, subjects will be allowed to take home the unsigned consent form for  
176 review prior to signing it if needed.

177 The virtual consent process for patients who contact study team members directly about  
178 potential interest in participating is summarized below:

- 179 1. subjects contact our study team after hearing about our study from indirect sources
- 180 2. Interested subjects are called by one of our study team members for a prescreening call  
181 in which we determine if they are eligible to participate in our study. This is also an

182 opportunity for Q&A for potential participants who may want eligibility information or  
183 details about the study prior to an official enrollment visit.

184 3. Potential subjects are securely emailed a copy of the IRB-approved ICF and scheduled  
185 for an official enrollment video visit that is mutually agreeable for the investigators and  
186 potential participant. The time period between this email and the enrollment visit will  
187 provide participants ample time to review the ICF in detail so that they have the  
188 opportunity to prepare additional questions during the official enrollment visit.

189 4. Investigators and potential participants engage in a video chat for consenting, in which  
190 REDCap will be used for execution of the consent process. Study participants will have the  
191 option to have the signed ICF sent to their personal email after it is signed by both parties.

192 6. Subsequently, Visit 1 will proceed following the procedures in our protocol

## 193 194 **10.0 Study Design / Methods**

- 195 • Potential subjects will be approached for informed consent as directed in sections  
196 8.0 and 9.0. Pertinent project information, risks, and time commitment will be  
197 relayed to subjects. If subjects show interest in participating, they will be given  
198 consent forms to either sign or bring home for consideration. A urine pregnancy  
199 test will be administered to these patients to confirm that they can be included in  
200 the study.
- 201 • If the patient is eligible for the study, he or she will be randomly assigned to one of  
202 two groups. They will have a 50/50 chance of being in either group. Neither the  
203 researchers nor you will make the choice to which group you are assigned. The  
204 two groups are Group A (cholesterol/lovastatin) and Group B (lovastatin only). The  
205 patient will not be informed of which group they are in and will not be informed of  
206 what their study medication is, allowing single-blinding. Researchers will not be  
207 masked.
- 208 • Enrolled subjects will be followed up at monthly intervals for three months via  
209 virtual check-in using an MUSC approved HIPAA compliant technology. At each  
210 visit, participants will undergo brief, limited physical examination (in order to  
211 determine disease severity and affected body surface area); additionally, clinical  
212 photographs of the lesion will be obtained in clinic or shared virtually with the  
213 investigators via secure email (sent to MUSC Outlook email). The physical exam  
214 will occur in-person or by using the virtual visit technology, which allows us to see  
215 the patient and visualize their skin findings.. Photographs will be stored in the  
216 coded study-specific medical record for further analysis of lesion features.
- 217 • At each visit a Patient Quality of Life, Physician Global Assessment Scale, and  
218 Actinic keratosis Field Assessment Scale will be administered.
- 219 • Patients will be contacted via virtual check-in visits at weeks 4, 8, and 12. Patients  
220 will be asked about compliance and any adverse effects experienced. Patients are  
221 also encouraged to contact Alan Snyder at any given point during the study if they  
222 think they are experiencing study-related side effects. Immediate consultation will  
223 follow to determine the severity of such event and necessary impacts on patient  
224 health and participation. Participants will also be contacted by phone by study team  
225 member to assess for any adverse effects at weeks 2 and 6 of treatment.

- 226 • Compounded topical medication prescribed to subjects will be self-applied twice  
227 daily. These medications will be prepared by Tidewater Pharmacy in Mount  
228 Pleasant, SC or Chemistry Rx in Philadelphia, PA. They will be prepared so the  
229 study will remain single-blinded (only investigators know which study drug they  
230 are receiving) and associated costs will not be covered by the research budget. The  
231 cost of the medication will be approximately \$85 when dispensed by Tidewater  
232 Pharmacy, or \$110 when dispensed by Chemistry Rx. The differences in costs are  
233 attributed to shipping and pharmacy fees.
- 234 • Both pharmacies will be compounding the drugs to be used in this study, and the  
235 compounding formula (recipe) will be identical between these two compounding  
236 pharmacies.
- 237 • Enrollment and prescription drug delivery to other states will not be performed  
238 until the respective state pharmacy boards confirm the legality of clinical telehealth  
239 interventions and out-of-state pharmacy prescriptions. All state and federal  
240 guidelines will be followed according to their regulations and recommendations.
- 241 • Patient prescriptions will be called in to their respective pharmacies by credentialed  
242 study team members after enrollment is completed. Individual prescriptions will be  
243 called in to the aforementioned pharmacies so that the pharmacies can individually  
244 ship the medication to the respective participant. Both pharmacies are well aware of  
245 the study protocol and procedures for sending the prescription. This will occur by  
246 standard procedure of calling medications for patients:
  - 247     ▪ 1. The study team member will call the pharmacist to  
248     inform them that a participant has been enrolled and ready  
249     to receive one of the two single-blinded drugs. The  
250     lovastatin/cholesterol combination has been assigned the  
251     arbitrary codename “RDC100”, and the lovastatin alone  
252     medication has been assigned the arbitrary codename  
253     “RDC15”. On the prescription label there will be the  
254     codename, application instructions, and storage instructions.
  - 255     ▪ 2. Per standard procedure of calling in a prescription, the  
256     study team member will verbally inform the  
257     Tidewater/Chemistry Rx pharmacist of the patient name,  
258     birthday, and phone number so that the medication can be  
259     prescribed and so that the patient can be contacted by the  
260     pharmacist for shipping and payment purposes.
  - 261     ▪ 3. The pharmacist will contact the patient over the phone in  
262     order to complete the medication payment over the phone  
263     and to identify the address to which the medication will be  
264     sent to.
  - 265     ▪ 4. The subject will inform the study team member upon  
266     receipt of the medication, confirm that they received the  
267     correct, randomized medication.
  - 268     ▪ 5. All of the information related to drug disposal and  
269     reception will be recorded on the coded Drug  
270     Accountability Sheet, which is located separately in the  
271     secure box drive.

- Medications will be able to be shipped to all continental US states by Chemistry Rx, except Alabama. This is because Chemistry Rx does not have the license to dispense to Alabama. Therefore, any participant reliant upon an Alabama address to receive their medication will not be allowed to participate in this study.
- Dermoscopic and clinical photographs will be subsequently analyzed for the presence of cornoid lamella. The team will record any additional dermoscopic or clinical features that may arise during the analyses.
- Frequency of dermoscopic and clinical features will be analyzed against clinical evolution to find possible predictors.
- Procedures during the day of imaging:  
 The doctor will identify the lesion(s) that will be analyzed.  
 The lesion(s) will be measured and clinical and dermoscopy photographs will be taken. Facial images might be taken to assess lesions on the head area.

Schedule of events:

| Event                                           | Screening Baseline Visit 1 | Week 4 (virtual) | Week 8 (virtual) | Week 12 (virtual) |
|-------------------------------------------------|----------------------------|------------------|------------------|-------------------|
| Informed consent                                | X                          |                  |                  |                   |
| Eligibility Assessment                          | X                          |                  |                  |                   |
| Demographics                                    | X                          |                  |                  |                   |
| Physical Examination                            | X                          |                  |                  |                   |
| Clinical photograph & Scale (3x) administration | X                          | X                | X                | X                 |
| Dermoscopic photograph                          | X                          |                  |                  |                   |
| Adverse events monitoring                       | X                          | X                | X                | X                 |

**11.0 Data Management**

- Continuous data will be summarized using descriptive statistics (number of values, means, standard deviation, median, minimum and maximum). Categorical data will be summarized using frequency tables (frequencies and percent).



- 292 • We are comparing before and after photographs from the same patient, hence  
293 we employ analysis by paired t-test to compare baseline data with data after  
294 treatment.
- 295 • Coded dermoscopic and clinical photographs may be obtained for further  
296 analyses. Files with patient images will be stored in a secure departmental drive  
297 that will only be accessible to study team members by their unique MUSC ID  
298 and password.
  - 299 ▪ Photos shared directly via email to study team members will be  
300 also be uploaded to the participants respective coded folder on  
301 the Box drive.
  - 302 ▪ These emailed photos (sent by the participant personal email)  
303 must be de-identified close up photos of the participants legs or  
304 arms, and sent only to study team members secure MUSC-  
305 assigned Outlook email addresses. Photos that do not fit this  
306 criteria will be deleted upon receipt and not used in the study.
- 307 • All subject medical record information and data collection will be coded and  
308 stored on an MUSC Box drive only accessible to study team members, and will  
309 be protected by two-factor authentication.

## 310 **12.0 Withdrawal of Subjects**

- 311 1. Any adverse effect during patient's treatment will require a thorough review of the adverse  
312 event by the study team members. Depending on the severity of the adverse event, the  
313 participant may be recommended to withdrawal from the study. The research team will  
314 continue to follow the patient until resolution of said adverse event has resolved.
- 315 2. Upon subject's verbal notification, the study team will evaluate the adverse event, they will  
316 proceed to document it and evaluate for subject safety. They will determine if subject is  
317 suitable to continue in the study.
- 318 3. Information will be provided about safe discontinuation of the drug and if any clinical  
319 review needs to occur. For evaluation and reporting purposes, researchers may conduct an  
320 exit interview and ask subjects about the reason for early withdrawal.
- 321 4. Subjects can participate in the study as long as they want. Subjects may verbally notify  
322 investigators if they wish to voluntarily withdrawal from the study and they will be  
323 removed immediately.

## 324 **13.0 Risks to Subjects**

- 326 • We anticipate minimal side effects and local irritation to be minimal. Muscle toxicity is  
327 a known adverse effect of statins. Patients will be notified during enrollment to watch  
328 out for common signs and symptoms such myalgias, fasciculations, cramping,  
329 myopathy and increased levels of CK. If an adverse event occurs, the subject must  
330 notify the study team members at their earliest convenience. Upon the subject's verbal  
331 notification to the study team, the study team will evaluate the adverse event and will  
332 proceed to document it and evaluate for subject safety. They will determine if subject is  
333 suitable to continue in the study.

- If there is an increased frequency of any concerning adverse event in particular, all enrolled participants in the trial will be sent an individual notice.
- There is a risk for possible breach of confidentiality as photographs of face may be taken to assess lesions on the head. However, all measures to keep information protected will be taken.
- There is a risk of emotional discomfort while the subject takes the questionnaires.
- A cumulative data assessment will be conducted every other month throughout the study's duration by study team members. A report that includes any available efficacy data, as well as a record of anticipated adverse events, will be compiled and submitted to the IRB at that time. Any event meeting the criteria of an unanticipated problem involving risks to subjects or others will be immediately reported to the MUSC IRB, as required by HRPP 4.7- Unanticipated Problems and Adverse Events Policy and Procedures.
- The plan for subject safety and minimizing risks of the research is as follows:  
Inspection of the treatment site at each visit. Adverse effects of topical lovastatin/cholesterol will be specifically assessed at each research visit by the investigator, per outlined procedures. Participants are encouraged to reach out to the study coordinator if they think they are experiencing any adverse events. Other expected adverse effects deemed intolerable by the patient will prompt reduction in the patient's dose and treatment if indicated. Any condition necessitating cessation of the study drug will be followed to resolution.
- However, the side effect profile associated with both topical cholesterol and lovastatin is extremely small. We do not anticipate there being any complications associated with treatment other than minor, local irritation. The rare chance of developing stain induced myopathy and its associated signs and symptoms will be addressed during enrollment and each individual visit.

#### 14.0 Potential Benefits to Subjects or Others

Patients will may benefit from the intervention. Researchers hope that the treatment will help clear active DSAP lesions, but all benefits are hypothetical currently.

#### 15.0 Sharing of Results with Subjects

Results may be shared with subjects at the end of the study per verbal request.

#### 16.0 Drugs or Devices

5. Drugs will be compounded by Tidewater Pharmacy or Chemistry Rx prior to the patients week 0 visit. They will be stored at this pharmacy until the subject is able to pick it up or have it delivered to their home address.
6. Investigators will be in charge to handle dermoscope and will be responsible to upload the images to the secured folder. The Dermatoscope is device used SOC for analysis of DSAP lesions.
7. An investigational drug exemption support document has been submitted to the eIRB.

#### References

1. Sasson M, Krain AD. Porokeratosis and cutaneous malignancy. A review. *Dermatol Surg.*

- 378 1996;22(4):339-342. doi:10.1111/j.1524-4725.1996.tb00327.x
- 379 2. Sertznig, P., von Felbert, V. and Megahed, M. (2012), Porokeratosis: present concepts. Journal of
- 380 the European Academy of Dermatology and Venereology, 26: 404-412. doi:[10.1111/j.1468-](https://doi.org/10.1111/j.1468-3083.2011.04275.x)
- 381 [3083.2011.04275.x](https://doi.org/10.1111/j.1468-3083.2011.04275.x)
- 382 3. Zhang Z, Li C, Wu F, et al. Genomic variations of the mevalonate pathway in porokeratosis. *Elife*.
- 383 2015;4:e06322. Published 2015 Jul 23. doi:10.7554/eLife.06322
- 384 4. Atzmony L, Lim YH, Hamilton C, et al. Topical cholesterol/lovastatin for the treatment of
- 385 porokeratosis: A pathogenesis-directed therapy. *J Am Acad Dermatol*. 2020;82(1):123-131.
- 386 doi:10.1016/j.jaad.2019.08.043
- 387 5. Jakóbsiak M, Bruno S, Skierski JS, Darzynkiewicz Z. Cell cycle-specific effects of lovastatin.
- 388 *Proc Natl Acad Sci U S A*. 1991;88(9):3628-3632. doi:10.1073/pnas.88.9.3628
- 389 6. Keyomarsi K, Sandoval L, Band V, Pardee AB. Synchronization of tumor and normal cells from
- 390 G1 to multiple cell cycles by lovastatin. *Cancer Res*. 1991;51(13):3602-3609.
- 391 <http://www.ncbi.nlm.nih.gov/pubmed/1711413>.
- 392
- 393

# Statistical Analysis Plan (SAP)

The Safety and Efficacy of topical 2% Lovastatin/2% Cholesterol and topical 2% Lovastatin for the treatment of Disseminated Superficial Actinic Porokeratosis: A single-blinded randomized clinical trial

Principal Investigator      Dirk Elston, MD, Professor and Chairman of Department of Dermatology and Dermatologic Surgery  
Medical University of South Carolina  
Charleston, SC

NCT ID number:              NCT04359823

Author                              Alex Drohan, MD  
Department of Dermatology and Dermatologic Surgery  
Medical University of South Carolina, Charleston, South Carolina

Version Draft 0.1

Statistical Analysis Plan

DSAP: Single-Blinded randomized trial

1/12/22

Principal Investigator

Dirk Elston, MD

Signature:



Date:

1/12/22

Author

Alex Drohan, MD

Signature:

*Alex Drohan*

Date:

1/12/2022

**Abbreviations**

DSAP        Disseminated Superficial Actinic Porokeratosis

GASI        General Assessment Severity Index

ITT         Intention to Treat

PP          Per Protocol

**Table of Contents**

|                                                   |   |
|---------------------------------------------------|---|
| 1. Introduction.....                              | 5 |
| 2. Study design .....                             | 5 |
| 2.1 Sample size calculation.....                  | 7 |
| 3. Aims and objectives.....                       | 7 |
| 4. Outcomes .....                                 | 7 |
| 4.1 Primary outcome.....                          | 8 |
| 4.2 Secondary outcomes.....                       | 8 |
| 4.3 Safety outcomes.....                          | 8 |
| 5. Populations and subgroups to be analyzed ..... | 8 |
| 5.1 Populations.....                              | 8 |
| 5.2 Subgroups.....                                | 9 |
| 6. Analyses.....                                  | 9 |
| 6.1 Primary outcome.....                          | 8 |
| 6.2 Secondary outcomes.....                       | 8 |
| 7. Missing data .....                             | 9 |

## 1 Introduction

The aim of this study is to test in a single-center randomized clinical trial, if topical statins combined with topical cholesterol can reduce the severity (size, color, quality of life impact) of disseminated superficial actinic vs statin therapy alone.

This statistical analysis plan (SAP) will give more detailed descriptions of the endpoints in the study and the corresponding analysis.

## 2 Study Design

Patients with previous diagnosis of DSAP will be approached for informed consent as directed in sections 8.0 and 9.0 of the protocol. If the patient is eligible for the study, he or she will be randomly assigned to one of two groups, Group A (cholesterol/lovastatin) and Group B (lovastatin only). The patient will not be informed of which group they are in and will not be informed of what their study medication is, allowing single-blinding. Researchers will not be masked.

Enrolled subjects will be followed up at monthly intervals for three months via virtual check-in using an MUSC approved HIPAA compliant technology. At each visit, participants will undergo brief, limited physical examination (in order to determine disease severity and affected body surface area); additionally, clinical photographs of the lesion will be obtained in clinic or shared virtually with the investigators via secure email (sent to MUSC Outlook email). The physical exam will occur in-person or by using the virtual visit technology, which allows us to see the patient and visualize their skin findings. Photographs will be stored in the coded study-specific medical record for further analysis of lesion features.

At each visit a Patient Quality of Life, Physician Global Assessment Scale, and RAND36 will be administered.

Patients will be contacted via formal virtual visits at weeks 4, 8, and 12 and non-formal check-ins at weeks 2 and 6. Patients will be asked about compliance and any adverse effects experienced. Patients are also encouraged to contact Alan Snyder and/or Gabriella Santa Lucia at any given point during the study if they think they are experiencing study-related side effects. Immediate consultation will follow to determine the severity of such event and necessary impacts on patient health and participation. Non-formal check-ins will be done over phone by study team member to assess for any adverse effects at weeks 2 and 6 of treatment.

Compounded topical medication prescribed to subjects will be self-applied twice daily. These medications will be prepared by Tidewater Pharmacy in Mount Pleasant, SC or Chemistry Rx in Philadelphia, PA dependent upon patient geography. They will be prepared so the study will remain single-blinded (only investigators know which study drug they are receiving) and associated costs will not be covered by the research budget. The cost of the medication will be approximately \$85 when dispensed by Tidewater Pharmacy,



or \$110 when dispensed by Chemistry Rx. The differences in costs are attributed to shipping and pharmacy fees.

Both pharmacies will be compounding the drugs to be used in this study, and the compounding formula (recipe) will be identical between these two compounding pharmacies.

Enrollment and prescription drug delivery to other states will not be performed until the respective state pharmacy boards confirm the legality of clinical telehealth interventions and out-of-state pharmacy prescriptions. All state and federal guidelines will be followed according to their regulations and recommendations.

Patient prescriptions will be called in to their respective pharmacies by credentialed study team members after enrollment is completed. Individual prescriptions will be called in to the aforementioned pharmacies so that the pharmacies can individually ship the medication to the respective participant. Both pharmacies are well aware of the study protocol and procedures for sending the prescription. This will occur by standard procedure of calling medications for patients:

1. The study team member will call the pharmacist to inform them that a participant has been enrolled and ready to receive one of the two single-blinded drugs. On the prescription label there will be a codename, application instructions, and storage instructions.
2. Per standard procedure of calling in a prescription, the study team member will verbally inform the Tidewater/Chemistry Rx pharmacist of the patient name, birthday, and phone number so that the medication can be prescribed and so that the patient can be contacted by the pharmacist for shipping and payment purposes.
3. The pharmacist will contact the patient over the phone in order to complete the medication payment over the phone and to identify the address to which the medication will be sent to.
4. The subject will inform the study team member upon receipt of the medication, confirm that they received the correct, randomized medication.
5. All of the information related to drug disposal and reception will be recorded on the coded Drug Accountability Sheet, which is located separately in the secure box drive.

Medications will be able to be shipped to all continental US states by Chemistry Rx, except Alabama. This is because Chemistry Rx does not have the license to dispense to Alabama. Therefore, any participant reliant upon an Alabama address to receive their medication will not be allowed to participate in this study.

Dermoscopic and clinical photographs will be subsequently analyzed for the presence of cornoid lamella. The team will record any additional dermoscopic or clinical features that may arise during the analyses.

Frequency of dermoscopic and clinical features will be analyzed against clinical evolution to find possible predictors.

### Procedures during the day of imaging:

The doctor will identify the lesion(s) that will be analyzed.

The lesion(s) will be measured and clinical and dermoscopy photographs will be taken. Facial images might be taken to assess lesions on the head area.

### Schedule of events:

| Event                                           | Screening<br>Baseline<br>Visit 1 | Week 4<br>(virtual) | Week 8<br>(virtual) | Week 12<br>(virtual) |
|-------------------------------------------------|----------------------------------|---------------------|---------------------|----------------------|
| Informed consent                                | X                                |                     |                     |                      |
| Eligibility Assessment                          | X                                |                     |                     |                      |
| Demographics                                    | X                                |                     |                     |                      |
| Physical Examination                            | X                                |                     |                     |                      |
| Clinical photograph & Scale (3x) administration | X                                | X                   | X                   | X                    |
| Dermoscopic photograph                          | X                                |                     |                     |                      |
| Adverse events monitoring                       | X                                | X                   | X                   | X                    |

## 2.1 Sample Size Calculation

DSAP is a rare disease that effects people from a wide geographical region. The goal sample size for the study was to recruit 50 subjects, however, due to recruiting limitations and state regulations, we were only able to enroll 31 patients. No formal sample size calculation was necessary as this study is first of its kind.

## 3. Aims and Objectives

- The purpose of this study is to evaluate the effectiveness of cholesterol/lovastatin versus lovastatin alone to treat porokeratosis. Our working hypothesis is that both topical cholesterol/lovastatin and lovastatin alone are helpful in treating patients with disseminated superficial actinic porokeratosis (DSAP).
- Aims:
  - 1. To evaluate the response (lesion size, color, patient quality of life) to treatment with topical cholesterol/lovastatin and lovastatin alone in a series of patients with the diagnosis of DSAP.
  - 2. To characterize lesion patterns following topical treatment and patterns of lesion regression.
  - 3. Assess quality of life outcomes through RAND36 and DLQI surveys.

#### **4. Outcomes**

This section will present the outcomes investigated to answer the study aims and objectives. The analyses are described in section 6 Analyses.

##### **4.1 Primary outcome**

Percentage of lesion clearance after 12 weeks of therapy using an exploratory clinical measure modified from a validated psoriasis index. The Disseminated Actinic Porokeratosis General Assessment Severity Index (DSAP-GASI) included plaque/rim elevation, scaling, and color (0= clear, 1=almost clear, 2=mild, 3=moderate, and 4=severe).

##### **4.2 Secondary outcomes**

Self-reported evaluations (better, unchanged, worse) on overall appearance, color, scale, pain, and itch. Application frequency and consistency along with safety and tolerability were also assessed at each visit.

**Surveys:** Patient quality of life measures, DLQI, and RAND36

##### **4.3 Safety Outcomes**

###### **Adverse events**

Adverse events are reported at each clinic visit. Patients are also encouraged to contact Alan Snyder and/or Gabriella Santa Lucia at any given point during the study if they think they are experiencing study-related side effects. Immediate consultation will follow to determine the severity of such event and necessary impacts on patient health and participation. Participants will also be contacted by phone by study team member to assess for any adverse effects at weeks 2 and 6 of treatment.

#### **5. Populations and subgroups to be analyzed**

##### **5.1 Populations**

###### **Intention-to-treat (ITT)**

All randomized study subjects.

###### **Per Protocol (PP)**

All randomized study subjects completing the whole study period (complete cases). For a specific analysis, study subjects with missing data on any of the variables in the model will be excluded from the analysis. Analyses of this population is seen as a sensitivity analysis to investigate whether conclusions are sensitive to assumptions regarding the pattern of missing data.

## **6. Analysis**

All enrolled subjects are considered in the demographic data and safety analysis. Treatment efficacy is based on investigator-standardized patient-documented photographs. Repeat photo documentation will be obtained if image quality was inadequate or angle, lighting or location is not standardized to prior photos.

### **6.1 Primary outcome**

The primary analysis will compare the improvement in DSAP-GASI scores before treatment and after treatment in both groups. Only participants with clearly documented photos across all visits will be considered for the DSAP-GASI efficacy analysis. The scores will be graded by two blinded, trained physicians. Cronbach's Interrater reliability will be calculated among raters across visits and the scores will be averaged for each of the four visits. Overall efficacy will be examined using a 2X4 (Drug X Time) Repeated Measures Analyses of Variance (ANOVA). The statin/cholesterol vs statin groups will be compared and evaluated for significant differences

### **6.2 Secondary Outcomes**

Self-reported patient satisfaction on overall appearance, size, and color, will be recorded and examined using Chi-Square across drug for the final visit. Application frequency and safety may also be evaluated.

A cross-sectional analysis of sociodemographic data and self-reported DSAP-related impact on QoL (scale 1-10) was averaged at baseline, while the RAND36 and Dermatology Life Quality Index (DLQI) were distributed and averaged at weeks 0, 4, 8, and 12. Statistical measures used in analysis included a Repeated Measures Analyses of Variance (ANOVA) and Pearson correlation coefficient.

## **7. Missing Data**

Patients who failed to submit photographs for the analysis will be removed from the DSAP-GASI efficacy analysis. Missing data will be recorded and excluded from analysis.
