# Supplementary material
Source: PubMed Central journal article supplement (PMC10034663)
Supplement: jamadermatol-e230205-s002.pdf [file jamadermatol-e230205-s002.pdf]

## Data Sharing Statement

Santa Lucia. Safety and Efficacy of Topical Lovastatin Plus Cholesterol Cream vs Topical Lovastatin Cream Alone for the Treatment of Disseminated Superficial Actinic Porokeratosis. *JAMA Dermatol*. Published March 22, 2023. doi:10.1001/jamadermatol.2023.0205

### Data

**Data available:** No

### Additional Information

**Explanation for why data not available:** All data will be made available upon request.
